# Supplementary material for: Novel Azabicyclononane (ABN-5d) Derivative Inhibits Carrageenan-Induced Rat Hind Paw Edema
Source: Research Square preprint supplement (doi:10.21203/rs.3.rs-255420/v1), 2021-06-23
Supplement: Supplementary file 1 [file d18ad31912d133732876bad2.xlsx]

## Sheet: Paw weight
	con	carr	0.5mg	1mg	aspirin
	0.1	0.3	0.15	0.25	0.2
	0.15	0.35	0.25	0.3	0.2
	0.1	0.35	0.15	0.2	0.25								0HRS
	0.116667	0.333333	0.183333	0.25	0.216667						GROUP	ANIMAL BODY WEIGHT	BEF0RE TREATMENT	AFTER TREATMENT	1ST HR	2RD HR	3TH HR	4 TH HR
	0.0288675	0.0288675	0.057735	0.05	0.0288675						CONTROL	150	0.5	0.5	0.5	0.5	0.5	0.5
		#NAME?	#NAME?	#NAME?	#NAME?
											CARRAGENNAN	155	0.5	0.9	0.9	0.85	0.85	0.85
												150	0.5	0.9	0.95	0.85	0.85	0.85
											0.5mg	150	0.6	0.9	0.7	0.7	0.6	0.6
												155	0.5	0.9	0.75	0.7	0.6	0.6
											1mg	156	0.6	0.9	0.8	0.75	0.6	0.6
												160	0.6	0.9	0.8	0.78	0.55	0.6
												153.714	0.542857	0.842857	0.771429	0.732857	0.65	0.657143
												3.86067	0.0534522	0.151186	0.146791	0.11996	0.141421	0.136713
													#NAME?	#NAME?	#NAME?	#NAME?	#NAME?	#NAME?
											1hr	Control	Car	0.5mg	1mg
												0.5	0.9	0.8	0.7				1hr	2hr	3hr	4hr
												0.5	0.9	0.8	0.7			con	0.5	0.5	0.5	0.5
												0.5	0.9	0.75	0.75			car	0.9125	0.8625	0.8625	0.8125
												0.5	0.95	0.75	0.75			0.5mg	0.775	0.725	0.6125	0.5525
												0.5	0.9125	0.775	0.725			1mg	0.725	0.7125	0.5875	0.525
												#NAME?	#NAME?	#NAME?	#NAME?
											2hr	0.5	0.85	0.75	0.7
												0.5	0.9	0.7	0.75
												0.5	0.85	0.75	0.7
												0.5	0.85	0.7	0.7
												0.5	0.8625	0.725	0.7125
												#NAME?	#NAME?	#NAME?	#NAME?
											3hr	0.5	0.85	0.65	0.55
												0.5	0.85	0.6	0.6
												0.5	0.9	0.6	0.6
												0.5	0.85	0.6	0.6
												0.5	0.8625	0.6125	0.5875
												#NAME?	#NAME?	#NAME?	#NAME?
											4hr	0.5	0.8	0.55	0.5
												0.5	0.8	0.56	0.5
												0.5	0.85	0.55	0.55
												0.5	0.8	0.55	0.55
												0.5	0.8125	0.5525	0.525
												#NAME?	#NAME?	#NAME?	#NAME?

## Sheet: MPO
	MPO				PROTEIN
	Control	Carragennan	0.5mg	1 mg	Control	carragennan	0.5mg	1mg
A	0.085	0.279	0.14	0.185	1.217	0.965	1.302	1.272
B	0.089	0.283	0.142	0.181	1.21	0.995	1.338	1.258
C	0.091	0.294	0.141	0.187	1.228	1.115	1.309	1.321
D	0.09	0.288	0.139	0.207	1.132	1.38	1.529	1.216
E	0.089	0.281	0.139	0.198	1.158	1.349	1.559	1.223
F	0.091	0.291	0.142	0.206	1.193	1.358	1.667	1.236
			MPO protein OD						Total Protein OD
				Control	Carragennan	0.5mg	1 mg			Control	carragennan	0.5mg	1mg
			A	0.085	0.279	0.14	0.185		A	1.217	0.965	1.302	1.272
			B	0.089	0.283	0.142	0.181		B	1.21	0.995	1.338	1.258
			C	0.091	0.294	0.141	0.187		C	1.228	1.115	1.309	1.321
			D	0.09	0.288	0.139	0.207		D	1.132	1.38	1.529	1.216
			E	0.089	0.281	0.139	0.198		E	1.158	1.349	1.559	1.223
			F	0.091	0.291	0.142	0.206		F	1.193	1.358	1.667	1.236
			Mean	0.0891667	0.286	0.1405	0.194			1.18967	1.18967	1.18967	1.18967
				Control	Carragennan	0.5mg	1 mg
MPO OD/TOTAL PROTEIN OD				0.0698439	0.289119	0.107527	0.14544
				0.0735537	0.284422	0.106129	0.143879
				0.0741042	0.263677	0.107716	0.141559
				0.0795053	0.208696	0.0909091	0.17023
				0.0768566	0.208302	0.0891597	0.161897
				0.0762783	0.214286	0.085183	0.166667
			Mean	0.0750237	0.24475	0.0977705	0.154945
			stdev	0.00331226	0.038619	0.0104271	0.0127384
			TTEST		#NAME?	#NAME?	#NAME?

## Sheet: NO2
	NO2 STD		Concentration(µM)	OD
			0	0.0556667
			0.625	0.0656667
			1.25	0.0633333
			2.5	0.079
			5	0.1
			10	0.145333
			50	0.513667
			100	0.877667
		control	Carragennan	0.5mg	1mg
	A	0.059	0.38	0.168	0.316
	B	0.057	0.375	0.157	0.334
	C	0.058	0.377	0.158	0.301
	D	0.051	0.382	0.157	0.352
	E	0.049	0.368	0.152	0.35
	F	0.048	0.389	0.154	0.356
		control	Carragennan	0.5mg	1mg
		-0.169437	38.2001	12.8595	30.5501
		-0.4085	37.6024	11.5446	32.7017
		-0.288968	37.8415	11.6642	28.7571
		-1.12569	38.4392	11.5446	34.8532
		-1.36475	36.7657	10.947	34.6142
		-1.48428	39.2759	11.186	35.3314
	MEAN	-0.806937	38.0208	11.6243	32.8013
	STD	0.583952	0.844368	0.661934	2.65824
	TTEST	#NAME?	#NAME?	#NAME?	#NAME?

## Sheet: H2S
	Control	Carrageenan	0.5mg	1mg	Aspirin
	0.0217	0.067	0.0453	0.0597	0.0497
	0.0225	0.051	0.0458	0.0504	0.0404
	0.0215	0.052	0.0459	0.0509	0.0509
	0.0212	0.053	0.0458	0.0587	0.0578
	0.0203	0.053	0.0445	0.0575	0.0575
Mean	0.0217	0.0552	0.044	0.0566	0.0566
STDEV	0.000798749	0.00664831	0.000585662	0.004445	0.00711006

## Sheet: histology score
		Histologic grading was based on the following scale		for % calculation
		0 = no inflammation	0	0 to 0 %
		1 = mild inflammation	1	1 to 25 %
		2 = mild/moderate inflammation	2	25 to 50 %
		3 = moderate inflammation	3	50 to 75 %
		4 = moderate/severe inflammation	4	75 to 100 %
		5 = severe inflammation	5	1
	Inflammation
			Inflammatory Index Score
			Control	Carrageenan	Car +0.5mg	Car +1mg	Asp
			0	4	2	3	4
			0	5	3	4	3
			0	5	3	3	3
			0	5	2	3	3
			0	4.75	2.5	3.25	3.25
			0	0.5	0.57735	0.5	0.5
			0	#NAME?	#NAME?	#NAME?	#NAME?
		Based on the counting of nucleus
